# Supplementary material for: Nanostructured amalgams with tuneable silver–mercury bonding sites for selective electroreduction of carbon dioxide into formate and carbon monoxide
Source: Royal Society of Chemistry journal article supplement (doi:10.1039/c9ta03611c), 2019-01-01
Supplement: c9ta03611c1.pdf [file c9ta03611c1.pdf]

## **Supplementary Information**

### **Nanostructured Amalgams with Tuneable Silver-Mercury Bonding Sites for Selective Electroreduction of Carbon Dioxide into Formate and Carbon Monoxide**

Wanfeng Yang, Sheng Chen, Wenhao Ren, Yong Zhao, Xianjue Chen, Chen Jia, Junnan Liu,  
Chuan Zhao\*

School of Chemistry, The University of New South Wales, Sydney, New South Wales 2052,  
Australia

\*Corresponding author. Email: [chuan.zhao@unsw.edu.au](mailto:chuan.zhao@unsw.edu.au)

**Table S1** Atomic ratios of Ag and Hg in five np-Hg-Ag amalgams based on the quantification of EDX spectra.

| Samples                           | Ag/Hg atomic ratio |
|-----------------------------------|--------------------|
| Ag <sub>100</sub> Hg <sub>0</sub> | 100:0              |
| Ag <sub>91</sub> Hg <sub>9</sub>  | 93.47:6.53         |
| Ag <sub>83</sub> Hg <sub>17</sub> | 89.15:10.85        |
| Ag <sub>70</sub> Hg <sub>30</sub> | 77.20:22.80        |
| Ag <sub>60</sub> Hg <sub>40</sub> | 62.16:37.84        |

**Table S2** Atomic ratios of Ag and Hg in five np-Hg-Ag amalgams based on the quantification of ICP-MS analysis.

| Samples                           | Ag/Hg atomic ratio |
|-----------------------------------|--------------------|
| Ag <sub>100</sub> Hg <sub>0</sub> | 100:0              |
| Ag <sub>91</sub> Hg <sub>9</sub>  | 93.4:6.6           |
| Ag <sub>83</sub> Hg <sub>17</sub> | 86.8:13.2          |
| Ag <sub>70</sub> Hg <sub>30</sub> | 78.1:21.9          |
| Ag <sub>60</sub> Hg <sub>40</sub> | 69.4:30.6          |

**Table S3** Calculated results of the crystal structures and phase fractions of np-Ag-Hg amalgams based on the refinement of XRD.

| Samples                           | (111) peak position ( $2\theta/^\circ$ ) | Lattice parameters ( $\text{\AA}$ ) |         |         | Phase fraction (%) |                                     |
|-----------------------------------|------------------------------------------|-------------------------------------|---------|---------|--------------------|-------------------------------------|
|                                   |                                          | a                                   | b       | c       | Ag(Hg)             | Ag <sub>1.1</sub> Hg <sub>0.9</sub> |
| Ag <sub>100</sub> Hg <sub>0</sub> | 38.3                                     | 4.08867                             | 4.08867 | 4.08867 | /                  | /                                   |
| Ag <sub>91</sub> Hg <sub>9</sub>  | 38.1                                     | 4.1077                              | 4.1077  | 4.1077  | 100                | 0                                   |
| Ag <sub>83</sub> Hg <sub>17</sub> | 38.0                                     | 4.1229                              | 4.1229  | 4.1229  | 93.9               | 6.1                                 |
| Ag <sub>70</sub> Hg <sub>30</sub> | 37.7                                     | 4.157                               | 4.157   | 4.157   | 81.9               | 18.1                                |
| Ag <sub>60</sub> Hg <sub>40</sub> | 37.5                                     | 4.178                               | 4.178   | 4.178   | 83.7               | 16.3                                |

**Table S4** Summary of various bifunctional electrocatalysts for CO<sub>2</sub> reduction to formate or CO.

| Catalysts             | Electrolyte              | Formate               |         |                                 | CO                    |         |                                 | References |
|-----------------------|--------------------------|-----------------------|---------|---------------------------------|-----------------------|---------|---------------------------------|------------|
|                       |                          | <i>E/V</i><br>vs. RHE | FE<br>% | <i>j</i><br>mA cm <sup>-2</sup> | <i>E/V</i><br>vs. RHE | FE<br>% | <i>j</i><br>mA cm <sup>-2</sup> |            |
| Ag-Hg amalgam         | 0.5 M KHCO <sub>3</sub>  | -0.9                  | 85      | 5.1                             | -0.7                  | 58      | 0.4                             | This work  |
| Cu-In alloy           | 0.1 M KHCO <sub>3</sub>  | -1                    | 62      | 0.73                            | -0.9                  | 35      | 0.46                            | S1         |
| Ligand-modified Pd    | 0.5 M KHCO <sub>3</sub>  | -0.57                 | 82      | 1.72                            | -0.47                 | 27      | 0.2                             | S2         |
| OD-Cu                 | 0.1 M KHCO <sub>3</sub>  | -0.7                  | 36      | ~0.6                            | -0.5                  | 43      | ~0.26                           | S3         |
| C-Cu/SnO <sub>2</sub> | 0.5 M KHCO <sub>3</sub>  | -0.9                  | 85      | NA*                             | -0.7                  | 93      | NA                              | S4         |
| Ag-Sn alloy           | 0.5 M NaHCO <sub>3</sub> | -0.8                  | 80      | 16                              | -0.8                  | 18      | NA                              | S5         |
| CuInO <sub>2</sub>    | 0.1 M KHCO <sub>3</sub>  | -0.8                  | 70      | 1.4                             | -0.8                  | 10      | 0.2                             | S6         |
| Ag-In alloy           | 0.1 M KHCO <sub>3</sub>  | -1.2                  | 90      | NA                              | -0.8                  | 20      | NA                              | S7         |

\*: Not available

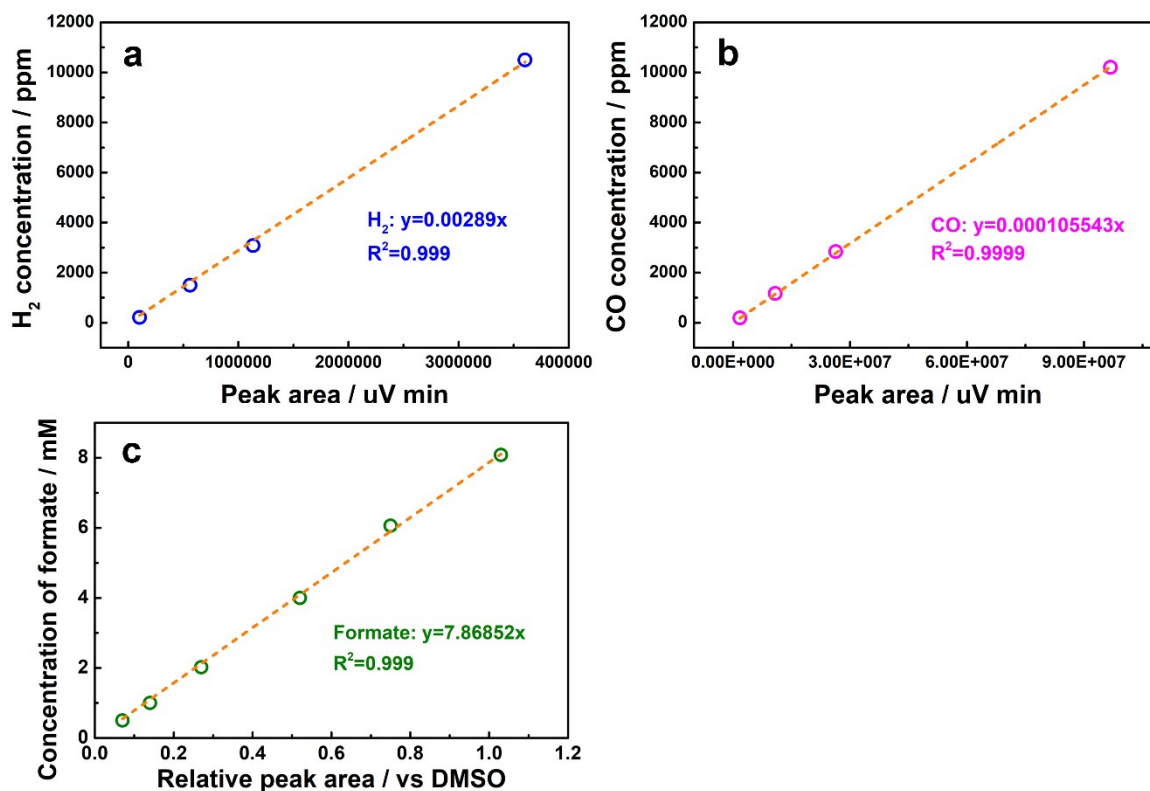

**Figure S1** (a) The linear relationship between H<sub>2</sub> concentration and the corresponding peak area, (b) the linear relationship between the CO concentration and the corresponding peak area, (c) the linear relationship between formate concentration and the corresponding relative area vs. DMSO.

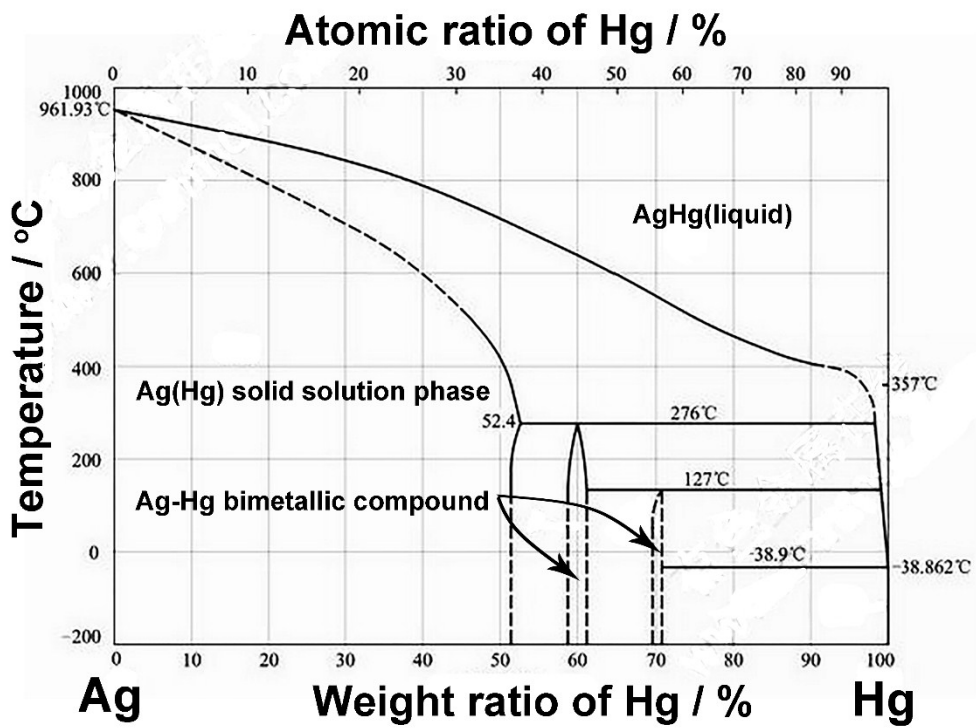

Figure S2 Ag-Hg phase diagram.<sup>S8</sup>

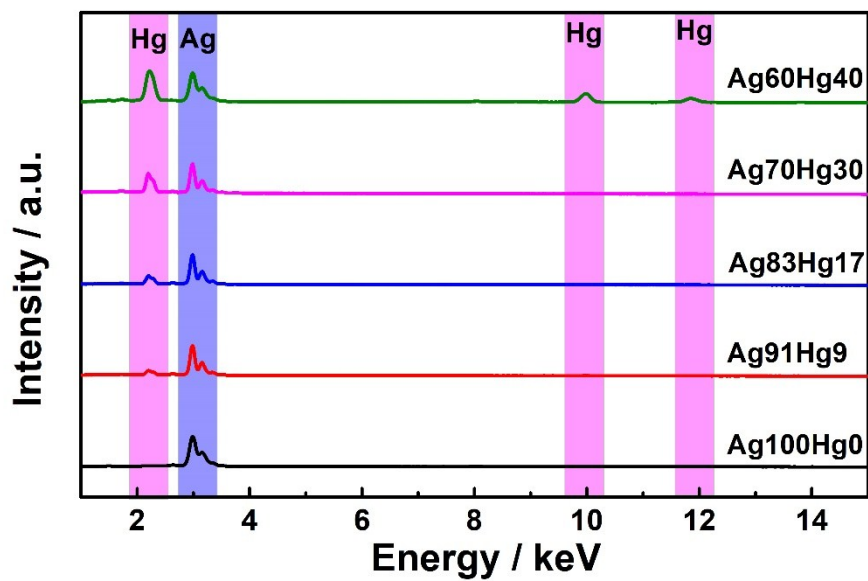

**Figure S3** EDX patterns of (a)Ag<sub>100</sub>Hg<sub>0</sub>, (b)Ag<sub>91</sub>Hg<sub>9</sub>, (c)Ag<sub>83</sub>Hg<sub>17</sub>, (d)Ag<sub>70</sub>Hg<sub>30</sub>, and (e)Ag<sub>60</sub>Hg<sub>40</sub>.



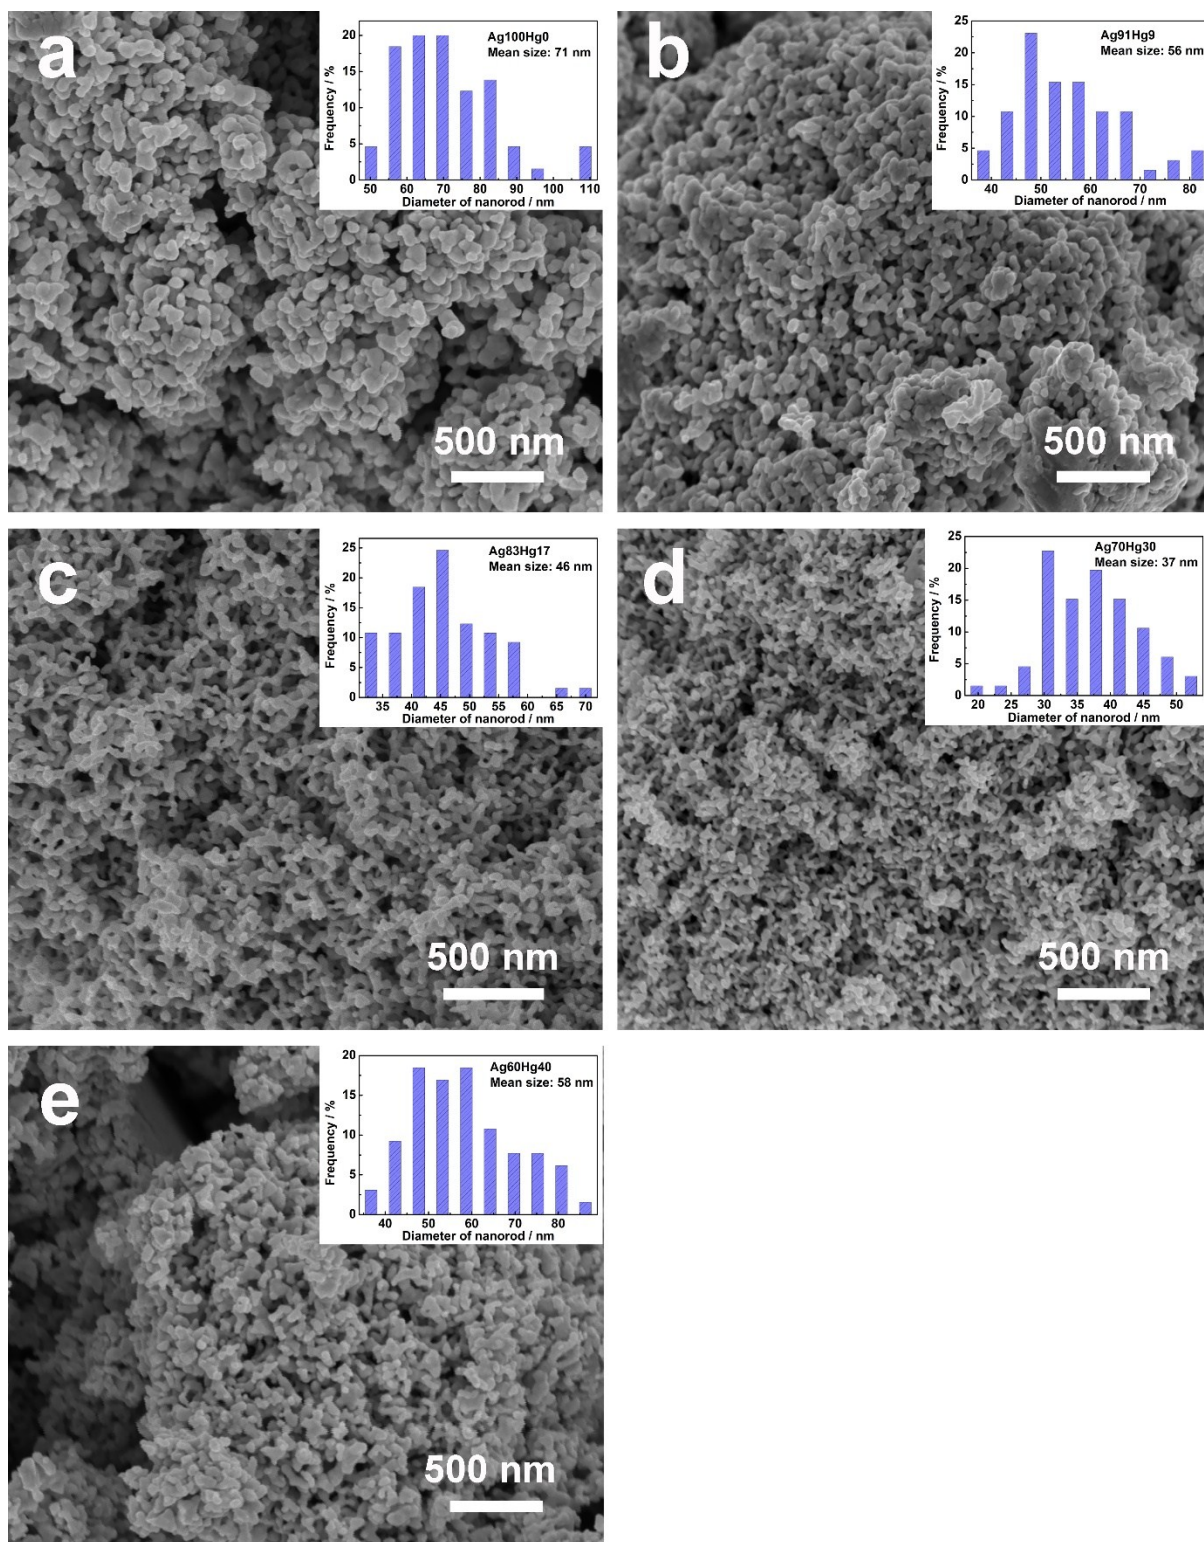

**Figure S4** SEM images and diameter of nanorod distributions of (a)Ag<sub>100</sub>Hg<sub>0</sub>, (b)Ag<sub>91</sub>Hg<sub>9</sub>, (c)Ag<sub>83</sub>Hg<sub>17</sub>, (d)Ag<sub>70</sub>Hg<sub>30</sub>, and (e)Ag<sub>60</sub>Hg<sub>40</sub>.

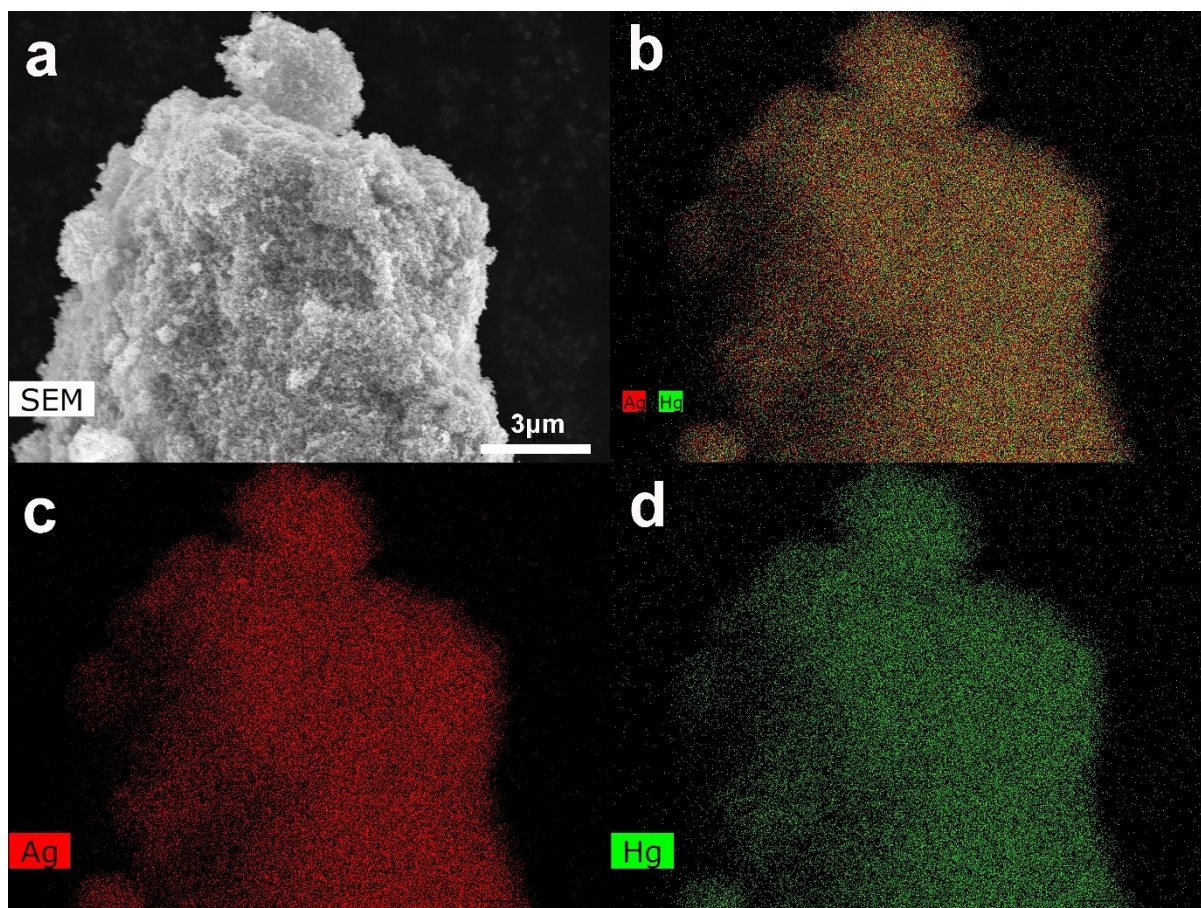

**Figure S5** (a) SEM image, (b-d) the corresponding EDX mapping results, including (b) distributions of Ag and Hg mixture, (c) separated Ag distributions and (d) separated Hg distributions of  $\text{Ag}_{70}\text{Hg}_{30}$ .

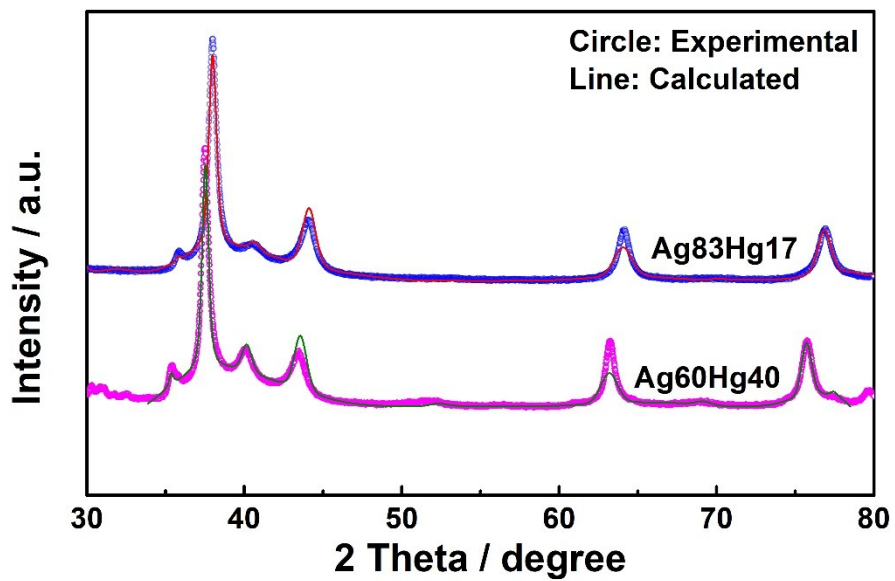

**Figure S6** XRD patterns and the corresponding Rietveld refinements of  $\text{Ag}_{83}\text{Hg}_{17}$  and  $\text{Ag}_{60}\text{Hg}_{40}$ .

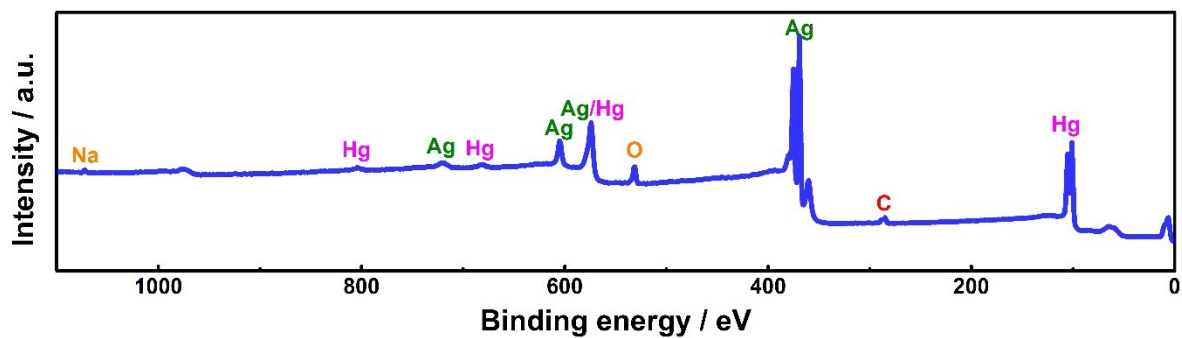

**Figure S7** Full XPS spectrum of for Ag<sub>70</sub>Hg<sub>30</sub>. Carbon originates from the carbon substrate, and oxygen is from the slight surface oxidation, and sodium comes from precursors during the synthesis process.

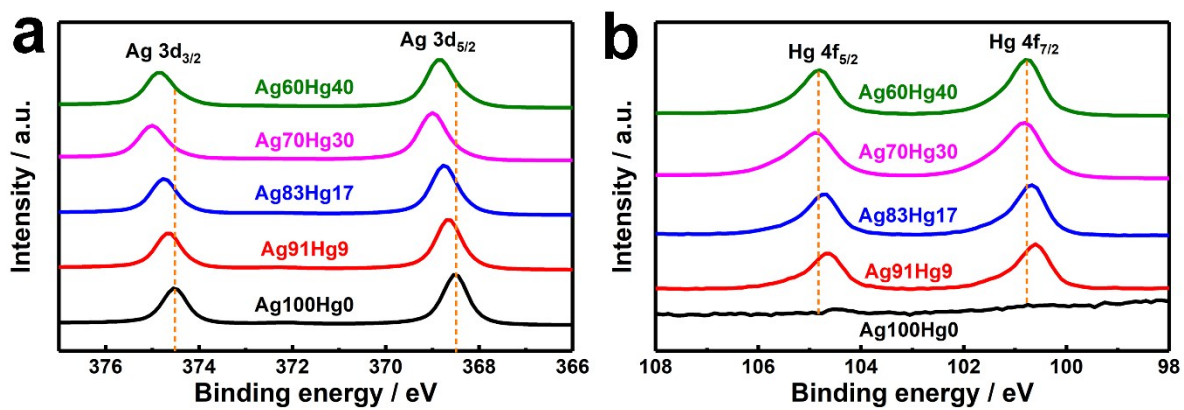

**Figure S8** XPS spectra Ag3d and Hg4f peaks for Ag<sub>100</sub>Hg<sub>0</sub>, Ag<sub>91</sub>Hg<sub>9</sub>, Ag<sub>83</sub>Hg<sub>17</sub>, Ag<sub>70</sub>Hg<sub>30</sub> and Ag<sub>60</sub>Hg<sub>40</sub>.

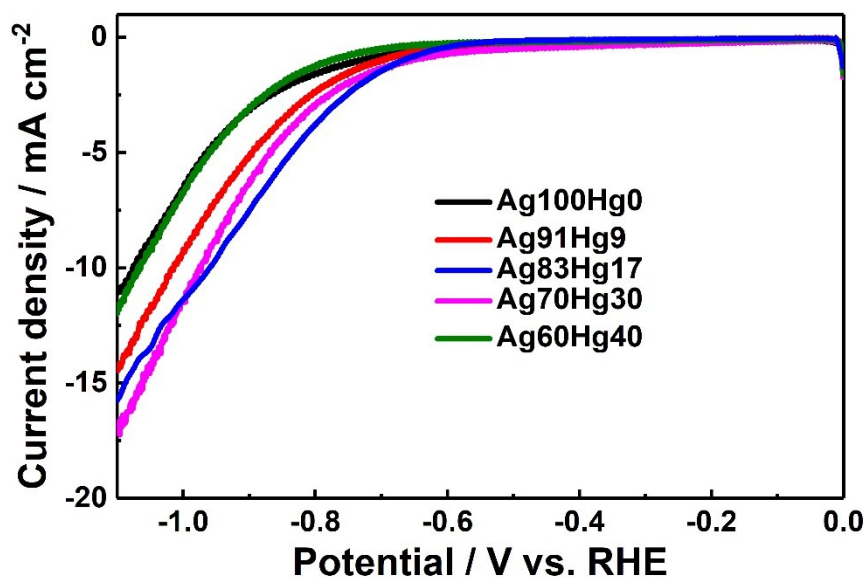

**Figure S9** LSV plots in CO<sub>2</sub>-saturated 0.5 M KHCO<sub>3</sub> aqueous solution at a scan rate of 20 mV s<sup>-1</sup> for np-Ag-Hg amalgams including Ag<sub>100</sub>Hg<sub>0</sub>, Ag<sub>91</sub>Hg<sub>9</sub>, Ag<sub>83</sub>Hg<sub>17</sub>, Ag<sub>70</sub>Hg<sub>30</sub> and Ag<sub>60</sub>Hg<sub>40</sub>.

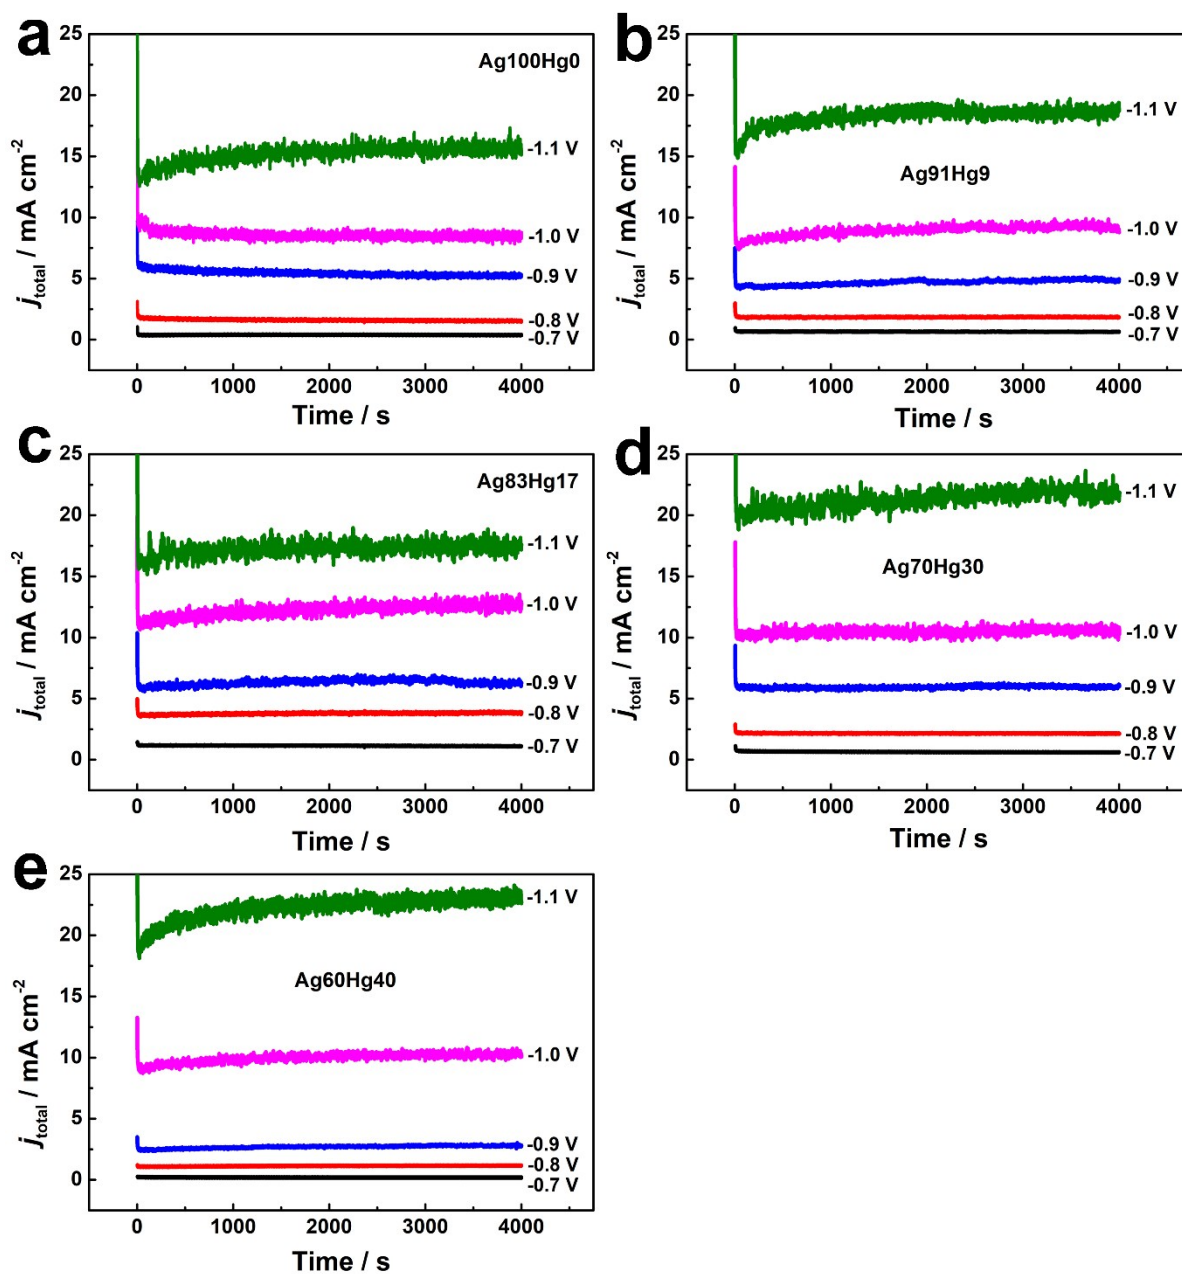

**Figure S10** Representative CO<sub>2</sub> electroreduction curves at various potentials in CO<sub>2</sub>-saturated 0.5 M KHCO<sub>3</sub> solution for np-Ag-Hg amalgams including (a) Ag<sub>100</sub>Hg<sub>0</sub>, (b) Ag<sub>91</sub>Hg<sub>9</sub>, (c) Ag<sub>83</sub>Hg<sub>17</sub>, (d) Ag<sub>70</sub>Hg<sub>30</sub> and (e) Ag<sub>60</sub>Hg<sub>40</sub>.

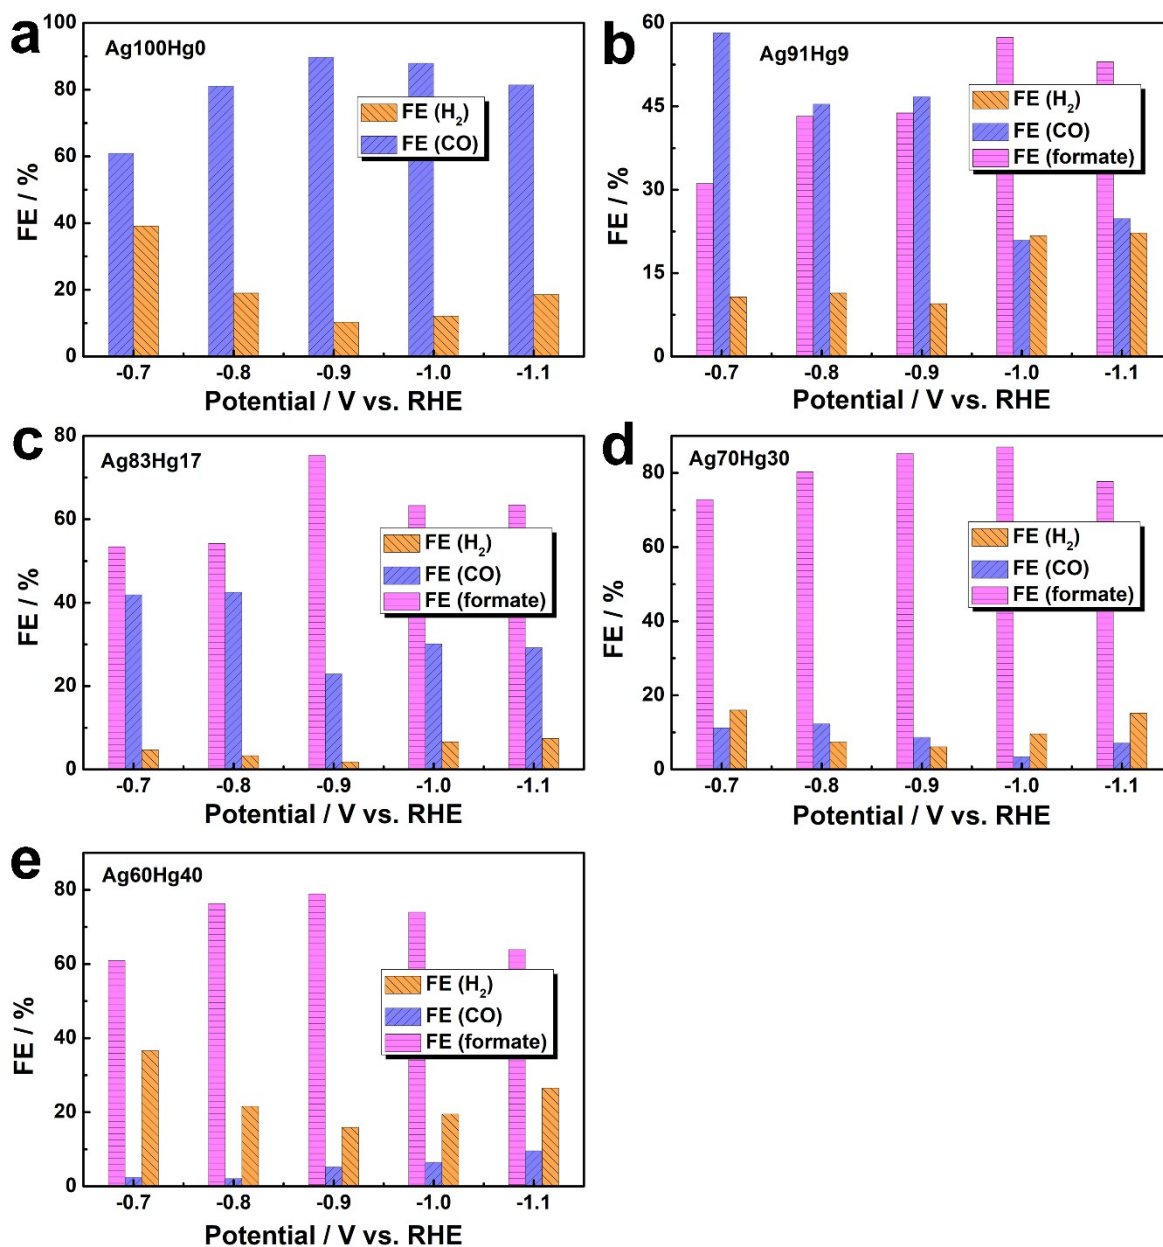

**Figure S11** FEs of H<sub>2</sub>, CO and formate at various potentials in CO<sub>2</sub>-saturated 0.5 M KHCO<sub>3</sub> solution for np-Ag-Hg amalgams including (a) Ag<sub>100</sub>Hg<sub>0</sub>, (b) Ag<sub>91</sub>Hg<sub>9</sub>, (c) Ag<sub>83</sub>Hg<sub>17</sub>, (d) Ag<sub>70</sub>Hg<sub>30</sub> and (e) Ag<sub>60</sub>Hg<sub>40</sub>.



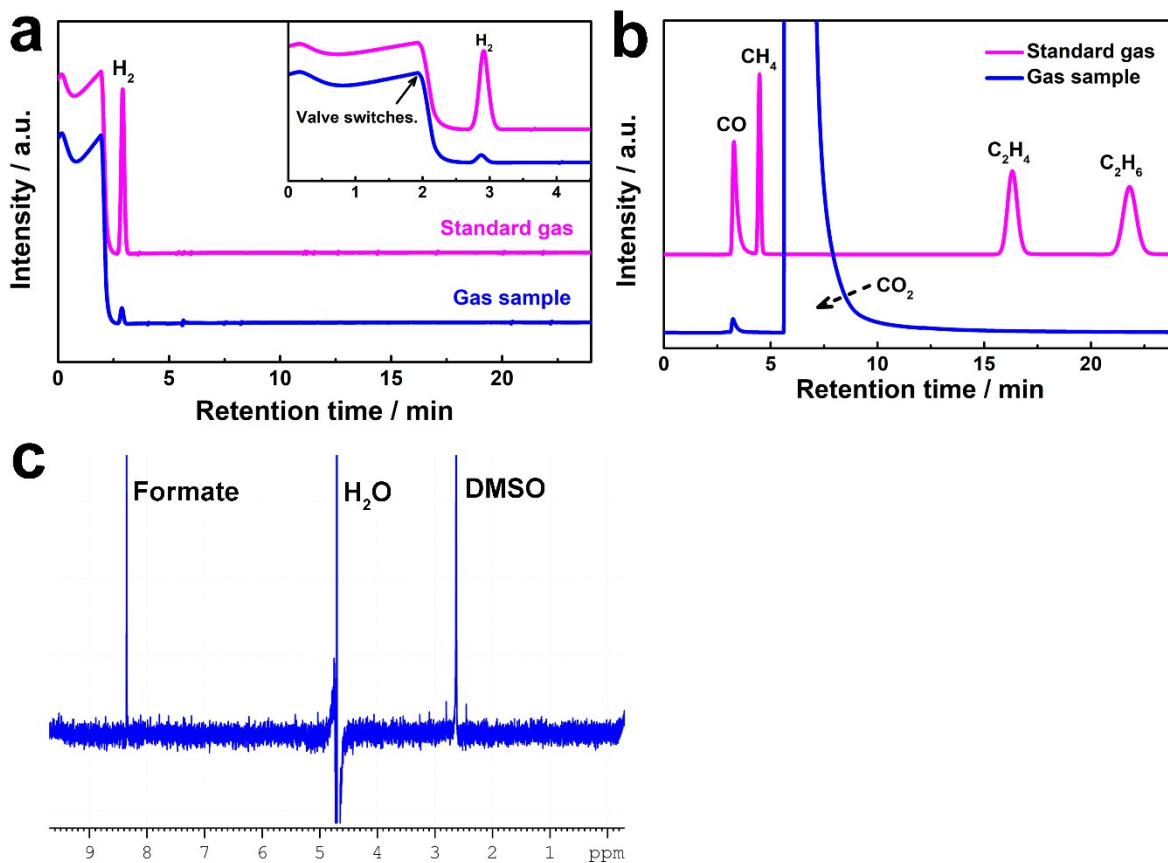

**Figure S12** Selected GC spectra including (a) TCD signals, and (b) FID signals of the gas products collected at  $-0.9$  V vs. RHE on  $\text{Ag}_{70}\text{Hg}_{30}$ , in comparison to the standard gas ( $\text{H}_2$  3080 ppm, CO 1170 ppm,  $\text{CH}_4$  964 ppm,  $\text{C}_2\text{H}_4$ : 1030 ppm,  $\text{C}_2\text{H}_6$  970 ppm in  $\text{N}_2$  as the balance gas). (c) Selected NMR spectrum of the liquid product collected at  $-0.9$  V vs. RHE with chronoamperometric electrolysis of 4000 s.

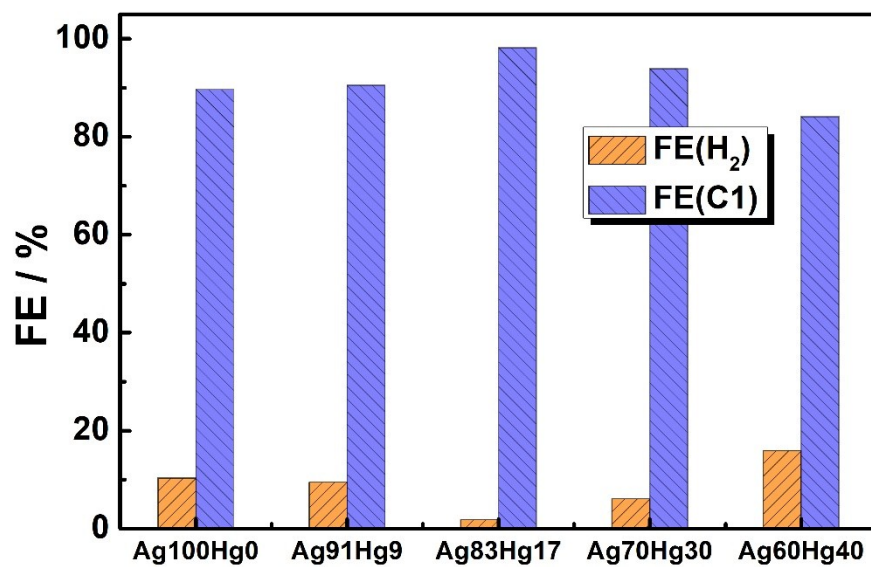

**Figure S13** Electrochemical CO<sub>2</sub> reduction activities of np-Ag-Hg amalgams evaluated by FEs of CRR and HER at -0.9 V vs. RHE.

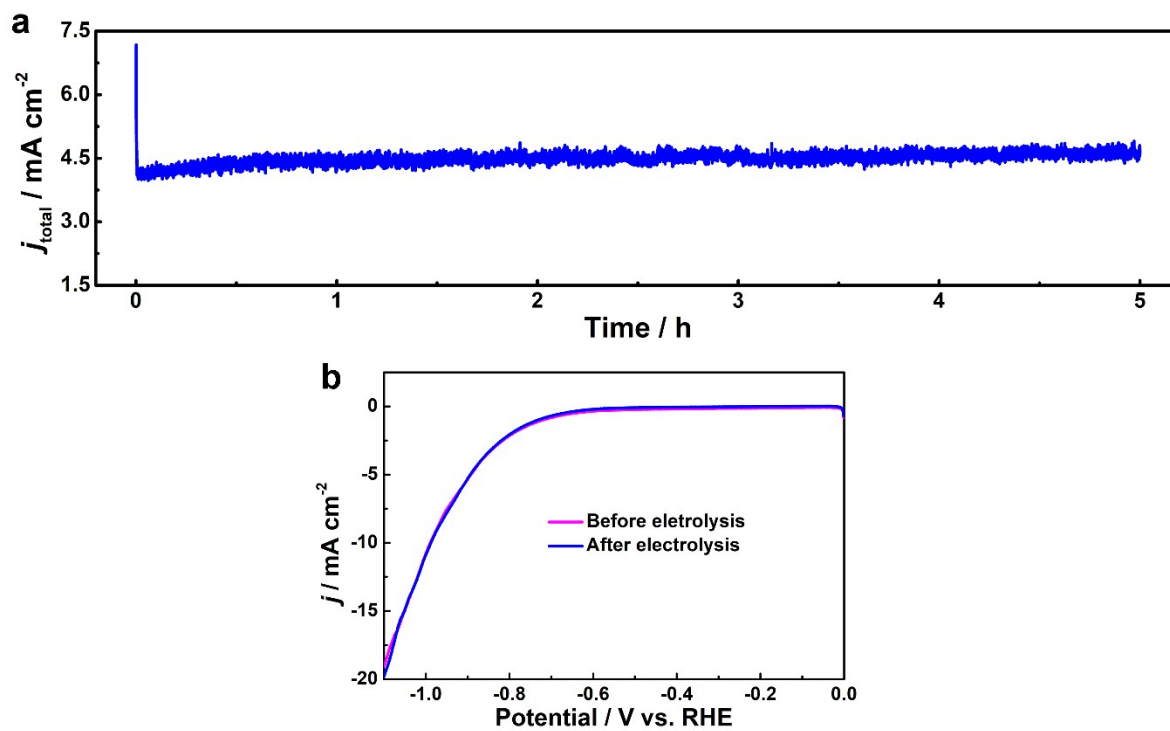

**Figure S14** (a) Chronoamperometric electrolysis on Ag<sub>70</sub>Hg<sub>30</sub> catalyst at -0.9 V vs. RHE for 5 h. (b) LSV curves on Ag<sub>70</sub>Hg<sub>30</sub> catalyst before and after chronoamperometric electrolysis at -0.9 V vs. RHE for 5 h.

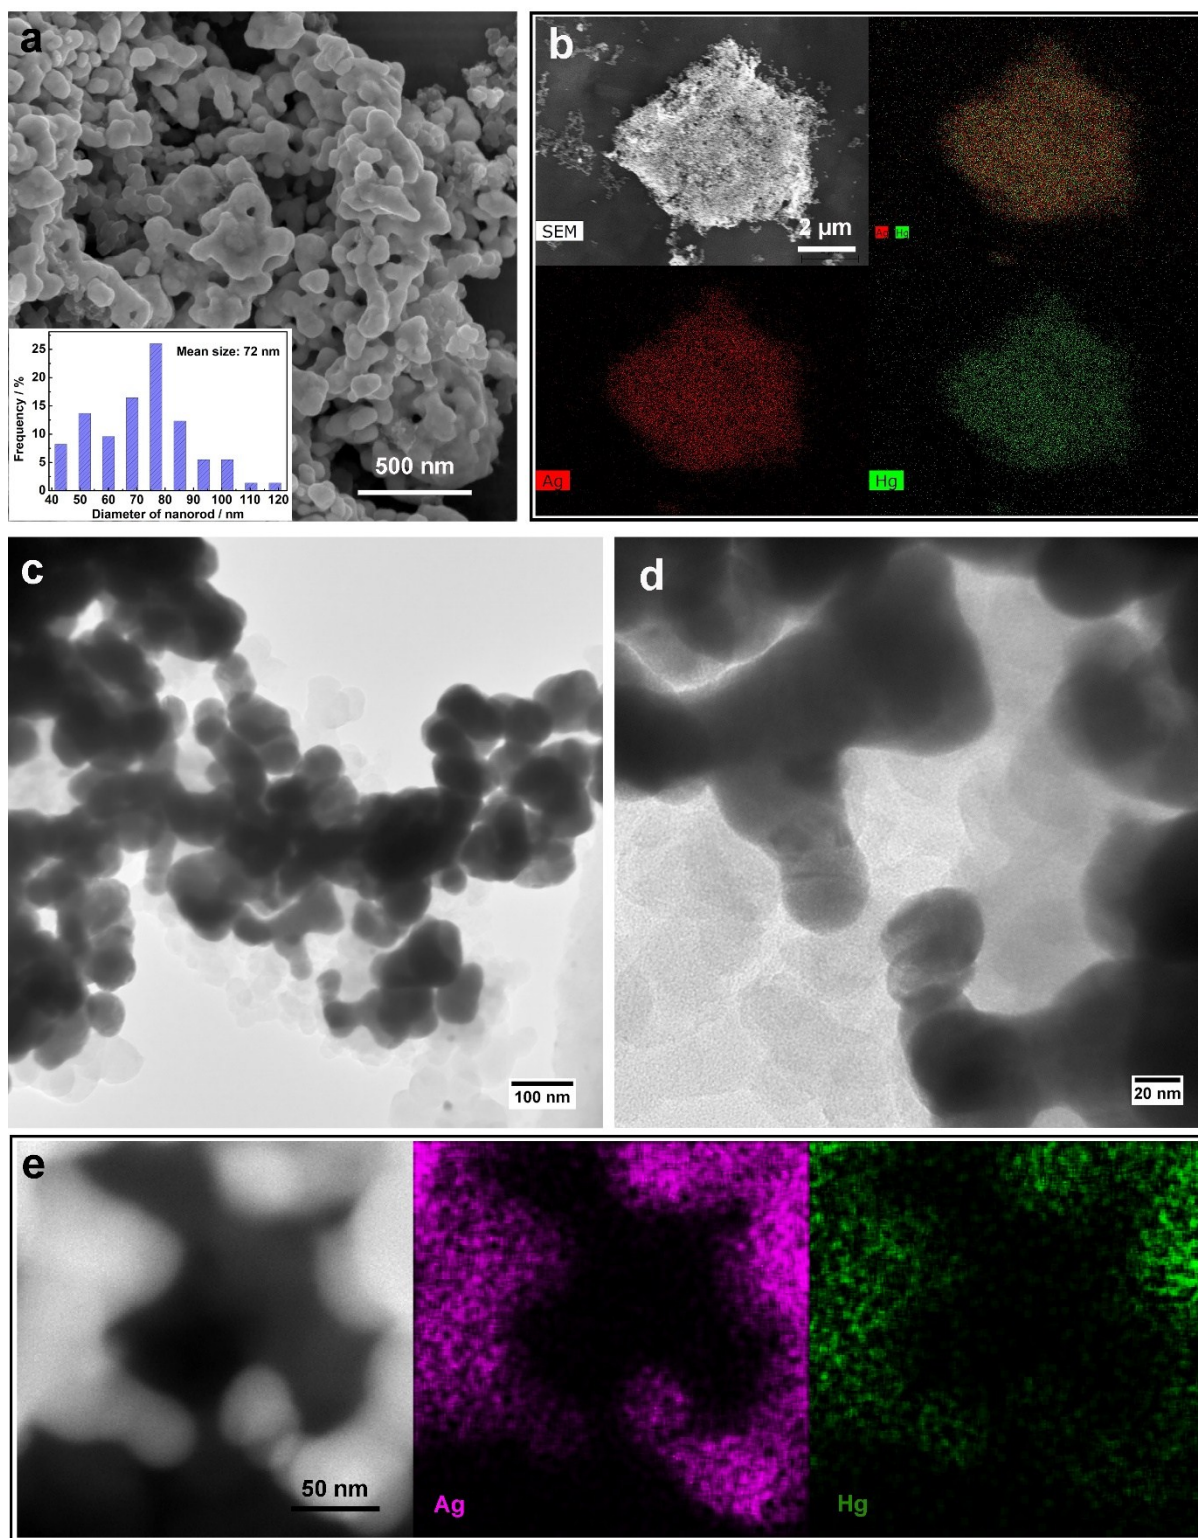

**Figure S15** (a) SEM image, (b) SEM element maps, (c, d) TEM images, and (e) TEM element maps of the Ag<sub>70</sub>Hg<sub>30</sub> after chronoamperometric electrolysis at -0.9 V vs. RHE for 5 h.

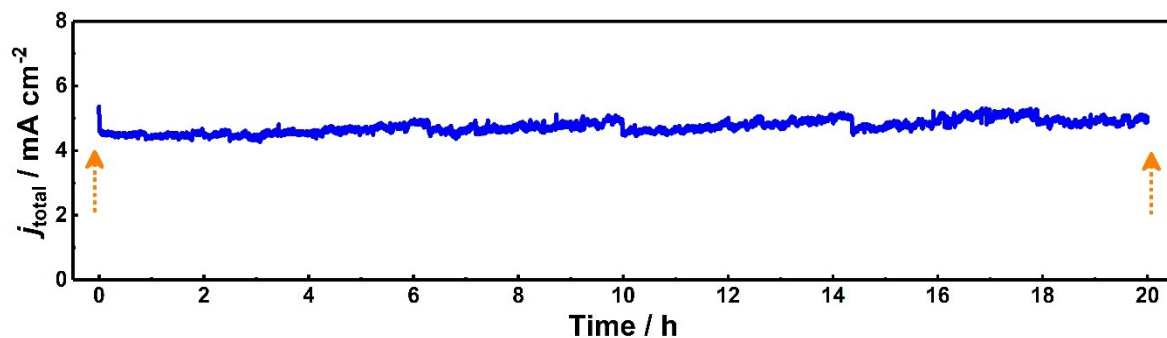

**Figure S16** Chronoamperometric electrolysis on  $\text{Ag}_{70}\text{Hg}_{30}$  catalyst at  $-0.9$  V vs. RHE for 20 h in  $\text{CO}_2$ -saturated  $0.5$  M  $\text{KHCO}_3$ . The concentration of  $\text{Hg}^{2+}$  in the electrolyte before and after electrolysis was  $0.024 \mu\text{g l}^{-1}$  and  $0.925 \mu\text{g l}^{-1}$  respectively, which was quantified by using ICP-MS. Since the World Health Organization recommends  $6 \mu\text{g l}^{-1}$  as the acceptable level of  $\text{Hg}^{2+}$  in drinking water,<sup>S9</sup> the Ag-Hg amalgams are stable and robust enough as the catalysts for  $\text{CO}_2$  reduction without water pollution. Besides, around  $134 \mu\text{g Hg}$  (calculated based on  $0.3$  mg of  $\text{Ag}_{70}\text{Hg}_{30}$  per electrode with 30 at. % Hg) was used for one electrode while  $0.02775 \mu\text{g Hg}^{2+}$  (calculated based on  $30$  ml electrolyte) was detected. This suggests that only 0.02% Hg was dissolved from the  $\text{Ag}_{70}\text{Hg}_{30}$  catalyst during the electrolysis, further confirming the stability of Ag-Hg amalgams.

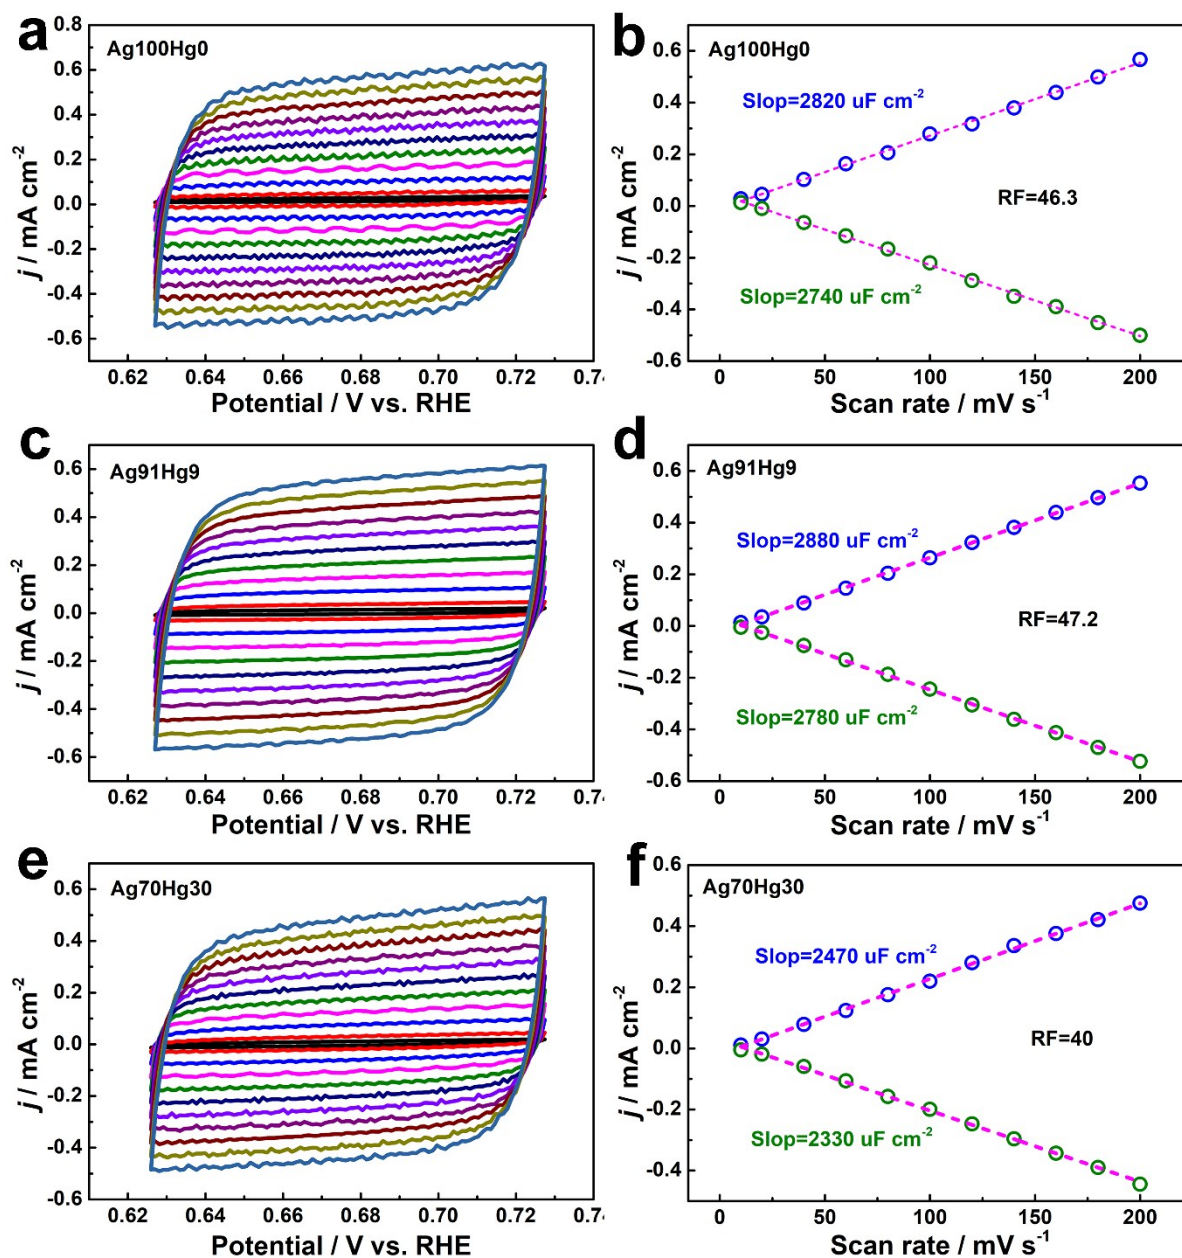

**Figure S17** Electrochemical capacitance measurements to determine the ECSA of electrodes. (a, c, e) CVs measured at different scan rates and (b, d, f) the measured capacitive currents plotted as a function of scan rate of Ag<sub>100</sub>Hg<sub>0</sub>, Ag<sub>91</sub>Hg<sub>9</sub> and Ag<sub>70</sub>Hg<sub>30</sub>, respectively.

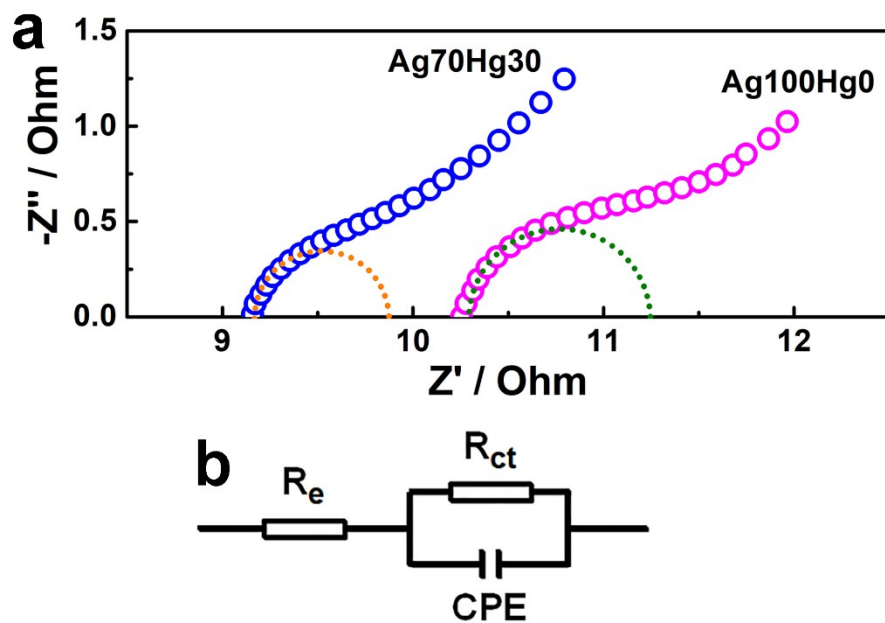

**Figure S18** (a) Nyquist plots of Ag<sub>70</sub>Hg<sub>30</sub> and Ag<sub>100</sub>Hg<sub>0</sub> catalysts at -0.9 V vs. RHE over the frequency range of 100 Hz-100 kHz. (b) Equivalent electrical circuit corresponding to the Nyquist plots.

## References

- S1 Z. B. Hoffman, T. S. Gray, K. B. Moraveck, T. B. Gunnoe and G. Zangari, *ACS Catal.*, 2017, **7**, 5381.
- S2 Z. Cao, J. S. Derrick, J. Xu, R. Gao, M. Gong, E. M. Nichols, P. T. Smith, X. Liu, X. Wen and C. Copéret, *Angew. Chem.*, 2018, **130**, 5075.
- S3 S. Rasul, D. H. Anjum, A. Jedidi, Y. Minenkov, L. Cavallo and K. Takanebe, *Angew. Chem. Int. Ed.*, 2015, **54**, 2146.
- S4 Q. Li, J. Fu, W. Zhu, Z. Chen, B. Shen, L. Wu, Z. Xi, T. Wang, G. Lu and J.-j. Zhu, *J. Am. Chem. Soc.*, 2017, **139**, 4290.
- S5 W. Luc, C. Collins, S. Wang, H. Xin, K. He, Y. Kang and F. Jiao, *J. Am. Chem. Soc.*, 2017, **139**, 1885.
- S6 A. Jedidi, S. Rasul, D. Masih, L. Cavallo and K. Takanebe, *J. Mater. Chem. A*, 2015, **3**, 19085.
- S7 G. O. Larrazábal, A. J. Martín, S. Mitchell, R. Hauert and J. Pérez-Ramírez, *J. Catal.*, 2016, **343**, 266.
- S8 M. Baren, *J. Phase Equilib.*, 1996, **17**, 122.
- S9 World Health Organization (WHO), *Guideline for drinking water quality*, Geneva (Switzerland), 4th edn, 2011.
